# Supplementary material
Source: publisher site journal article supplement (http://www.kjim.org/upload/media/kjim-2021-214-suppl6.pdf)
Supplement: Supplementary file 1 [file kjim-2021-214-suppl6.pdf]

**Supplementary Table 4. Multivariable Cox-hazard regression analyses for the effects of SHS exposure on new-onset hypertension in the propensity-score matching population**

|                                                                          | Person-years | No. of events | Incidence rate,<br>10,000 person-years | Hazard ratio<br>(95% confidence<br>interval)<br>Multivariable model |
|--------------------------------------------------------------------------|--------------|---------------|----------------------------------------|---------------------------------------------------------------------|
| SHS exposure at baseline                                                 |              |               |                                        |                                                                     |
| No SHS exposure                                                          | 18,711       | 190           | 101.5                                  | 1                                                                   |
| SHS exposure                                                             | 19,617       | 212           | 108.1                                  | 0.99 (0.81–1.21)                                                    |
| SHS exposure at follow-up                                                |              |               |                                        |                                                                     |
| No SHS exposure                                                          | 19,968       | 197           | 98.7                                   | 1                                                                   |
| SHS exposure                                                             | 18,360       | 205           | 111.7                                  | 1.35 (1.10–1.64) <sup>b</sup>                                       |
| SHS exposure change between at<br>baseline and at follow-up <sup>c</sup> |              |               |                                        |                                                                     |
| No SHS exposure                                                          | 9,654        | 82            | 84.9                                   | 1                                                                   |
| New SHS exposure                                                         | 9,057        | 108           | 119.2                                  | 1.62 (1.21–2.16) <sup>b</sup>                                       |
| Former SHS exposure                                                      | 10,314       | 115           | 111.5                                  | 1.19 (0.90–1.59)                                                    |
| Sustained SHS exposure                                                   | 9,303        | 97            | 104.3                                  | 1.36 (1.01–1.83) <sup>a</sup>                                       |

Multivariable model was adjusted for age, sex, body mass index, waist circumference, vigorous exercise ( $\geq 5$  times/week), alcohol consumption, presence of diabetes, creatinine, uric acid, total cholesterol, high density lipoprotein cholesterol, low density lipoprotein cholesterol, triglycerides, and high-sensitivity C-reactive protein.

SHS, secondhand smoke.

<sup>a</sup> $p < 0.05$ .

<sup>b</sup> $p < 0.01$ .

<sup>c</sup>The reference group was no SHS exposure group. No SHS exposure group was defined as individuals without SHS exposure both at baseline and at follow-up; New SHS exposure group as those without SHS exposure at baseline and with SHS exposure at follow-up; Former SHS exposure group as those with SHS exposure at baseline and without SHS exposure at follow-up; Sustained SHS exposure group as those with SHS exposure both at baseline and at follow-up.
